# Supplementary material
Source: PubMed Central journal article supplement (PMC4231880)
Supplement: NIHMS640614-supplement-Main_and_Supplementary_figures.pdf [file NIHMS640614-supplement-Main_and_Supplementary_figures.pdf]

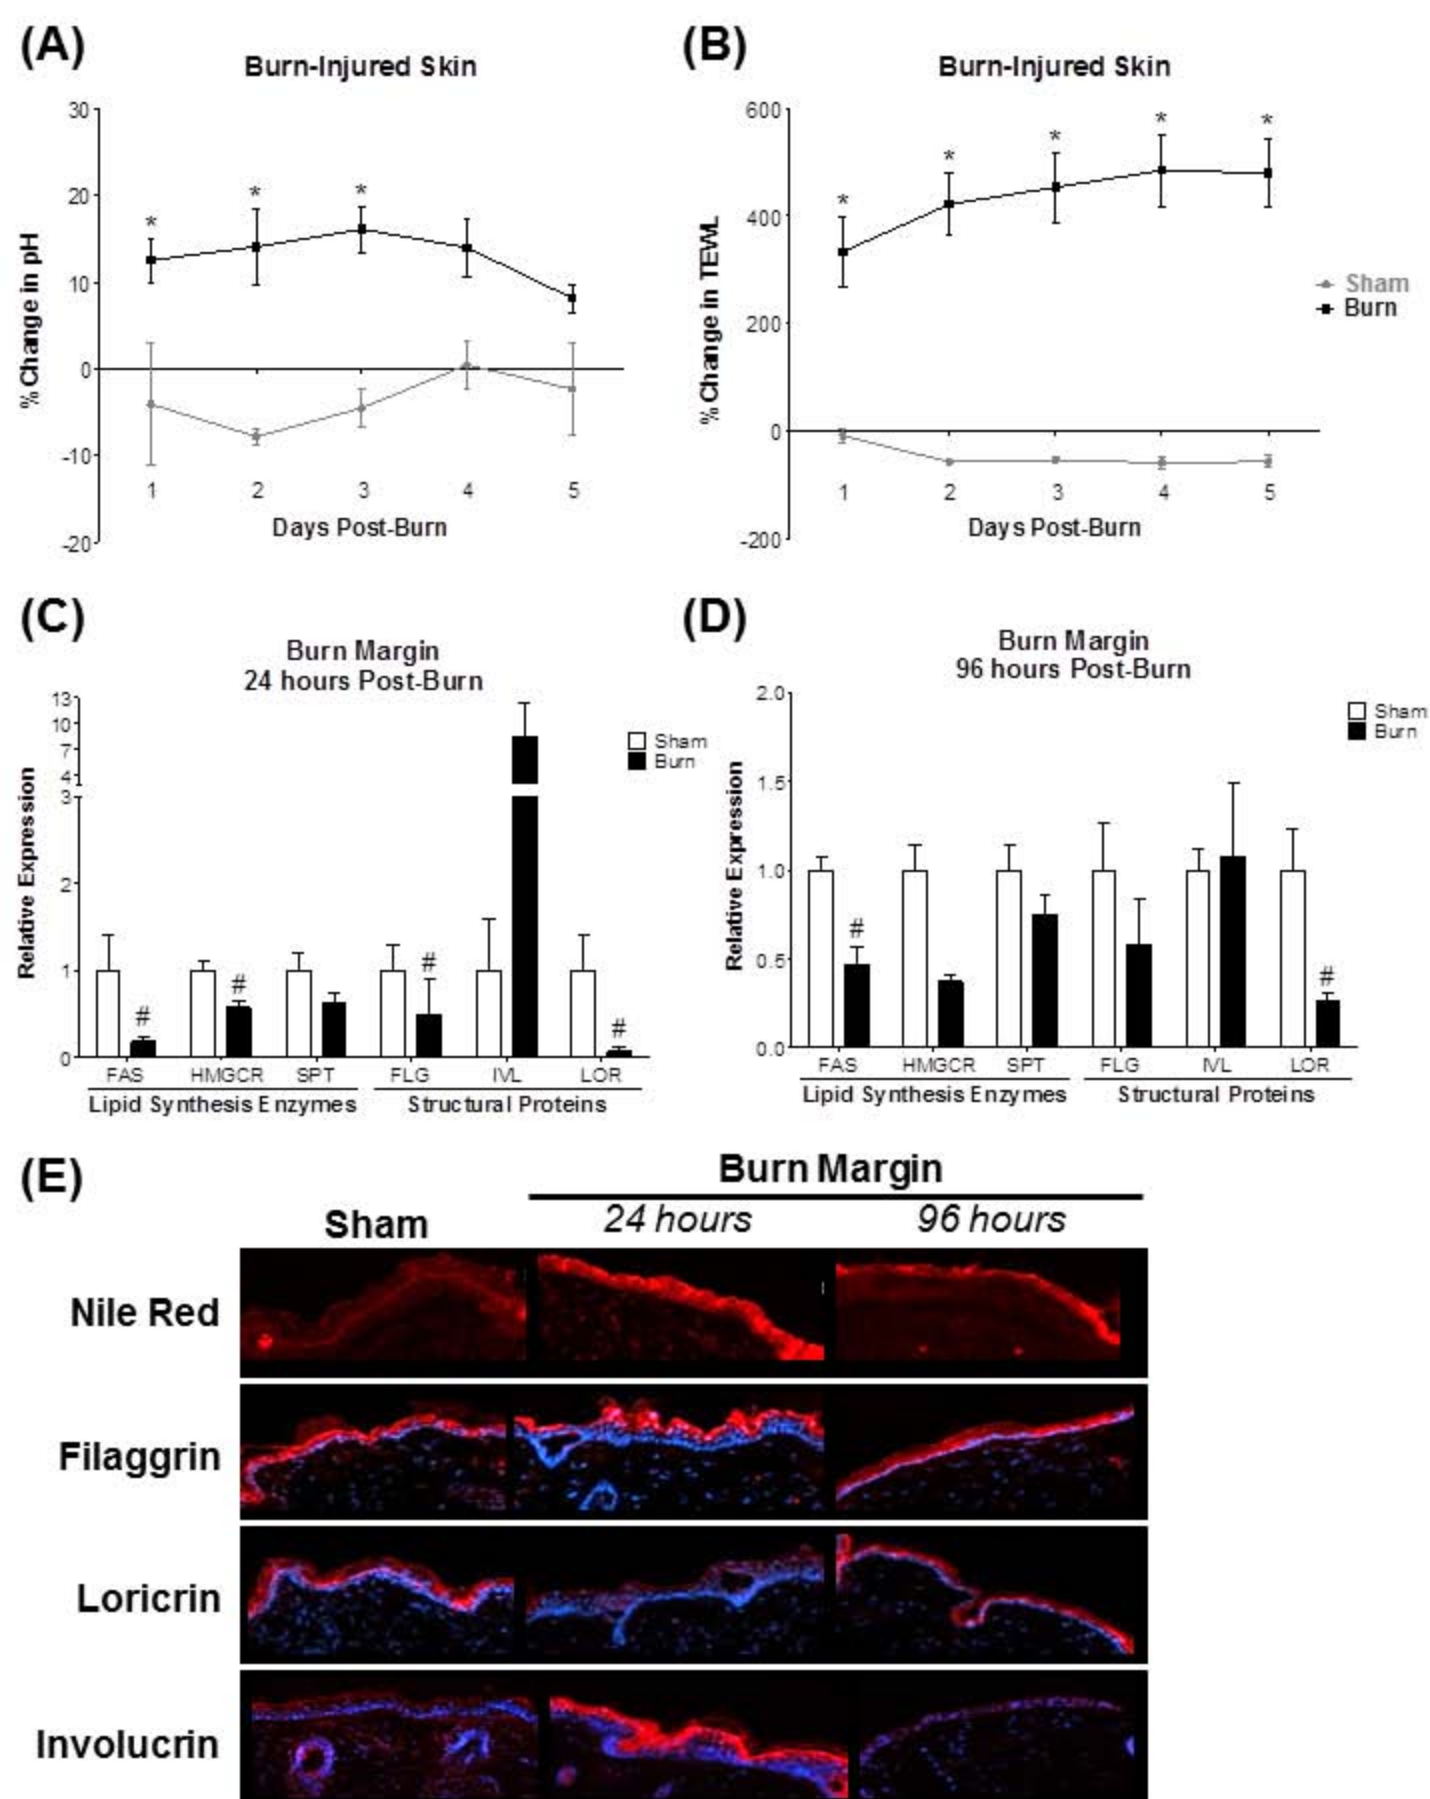

**Figure 1**

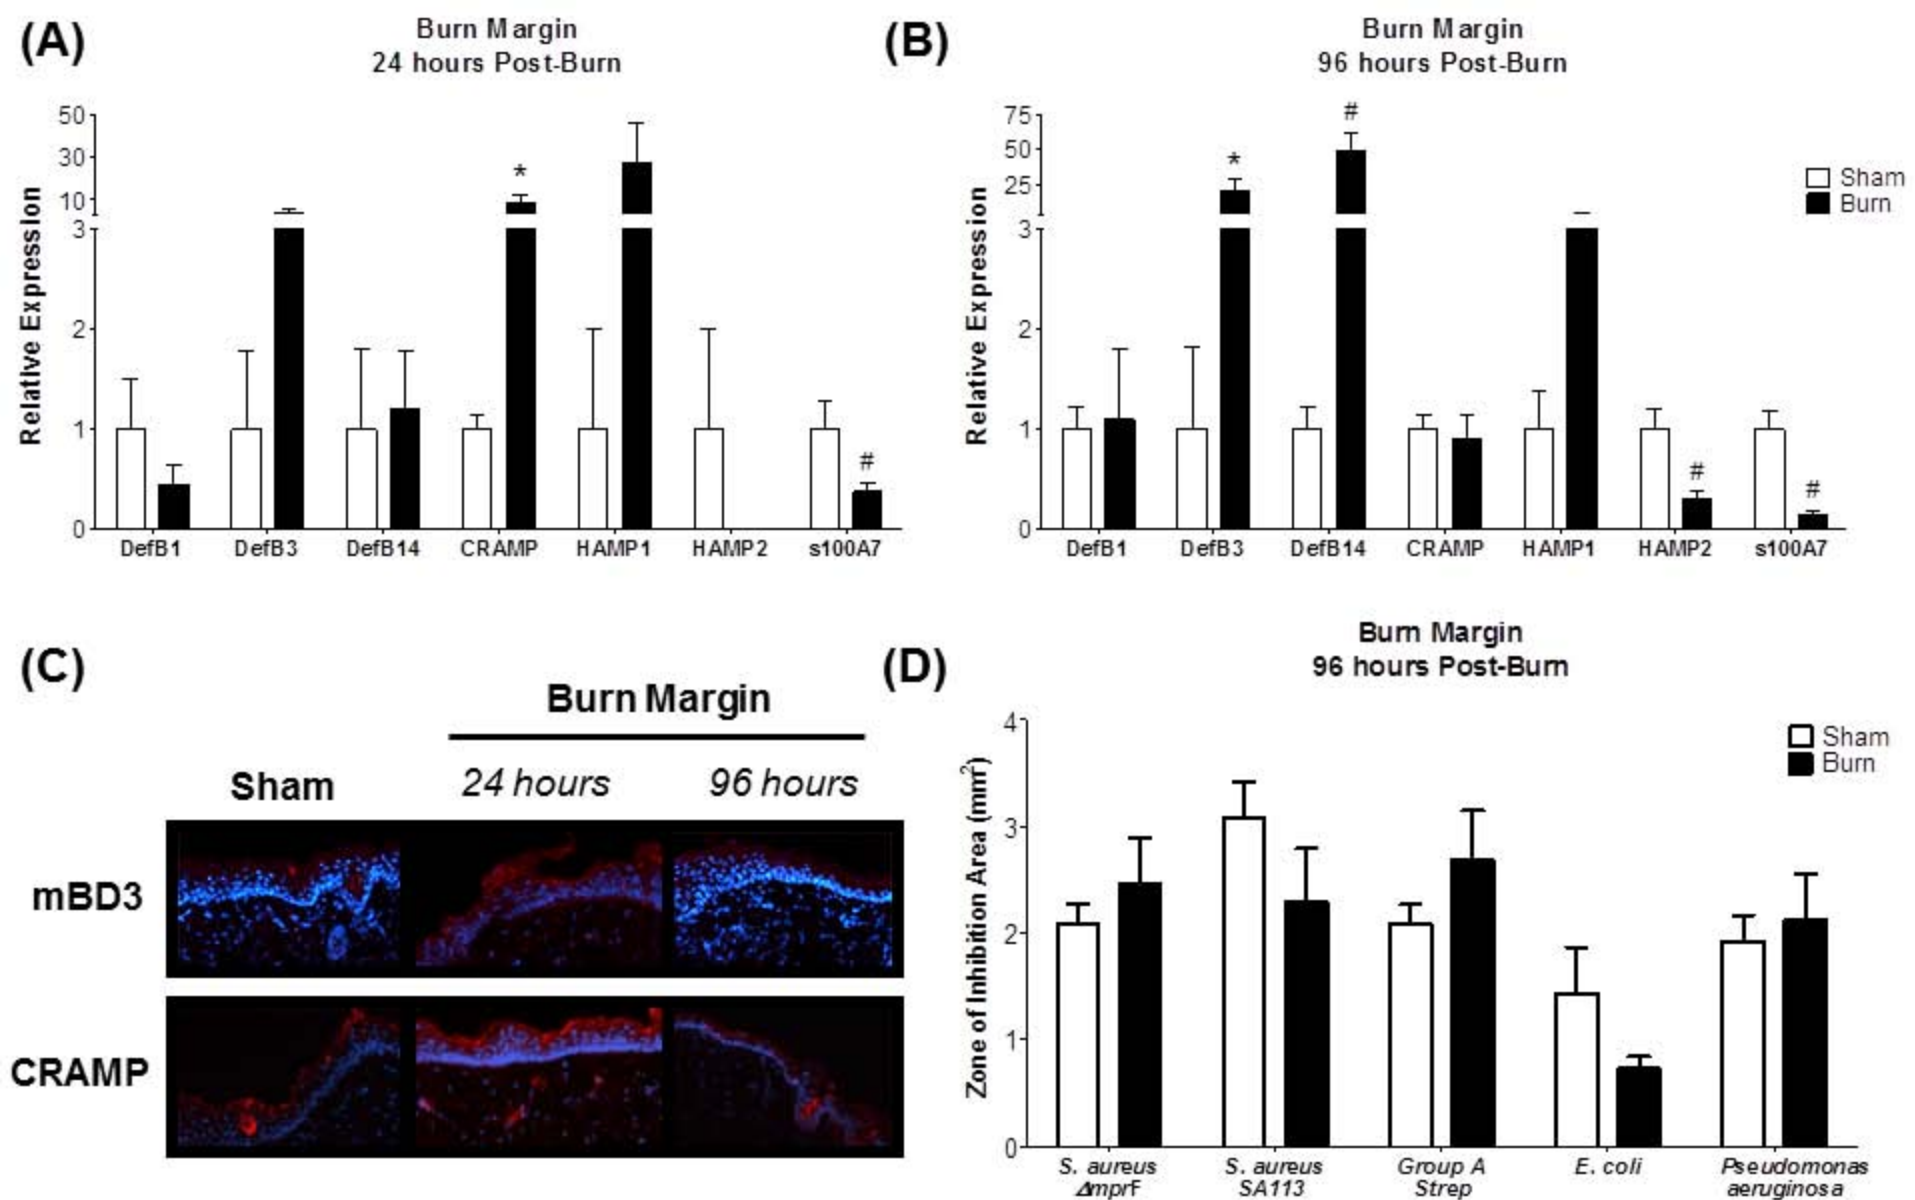

**Figure 2**

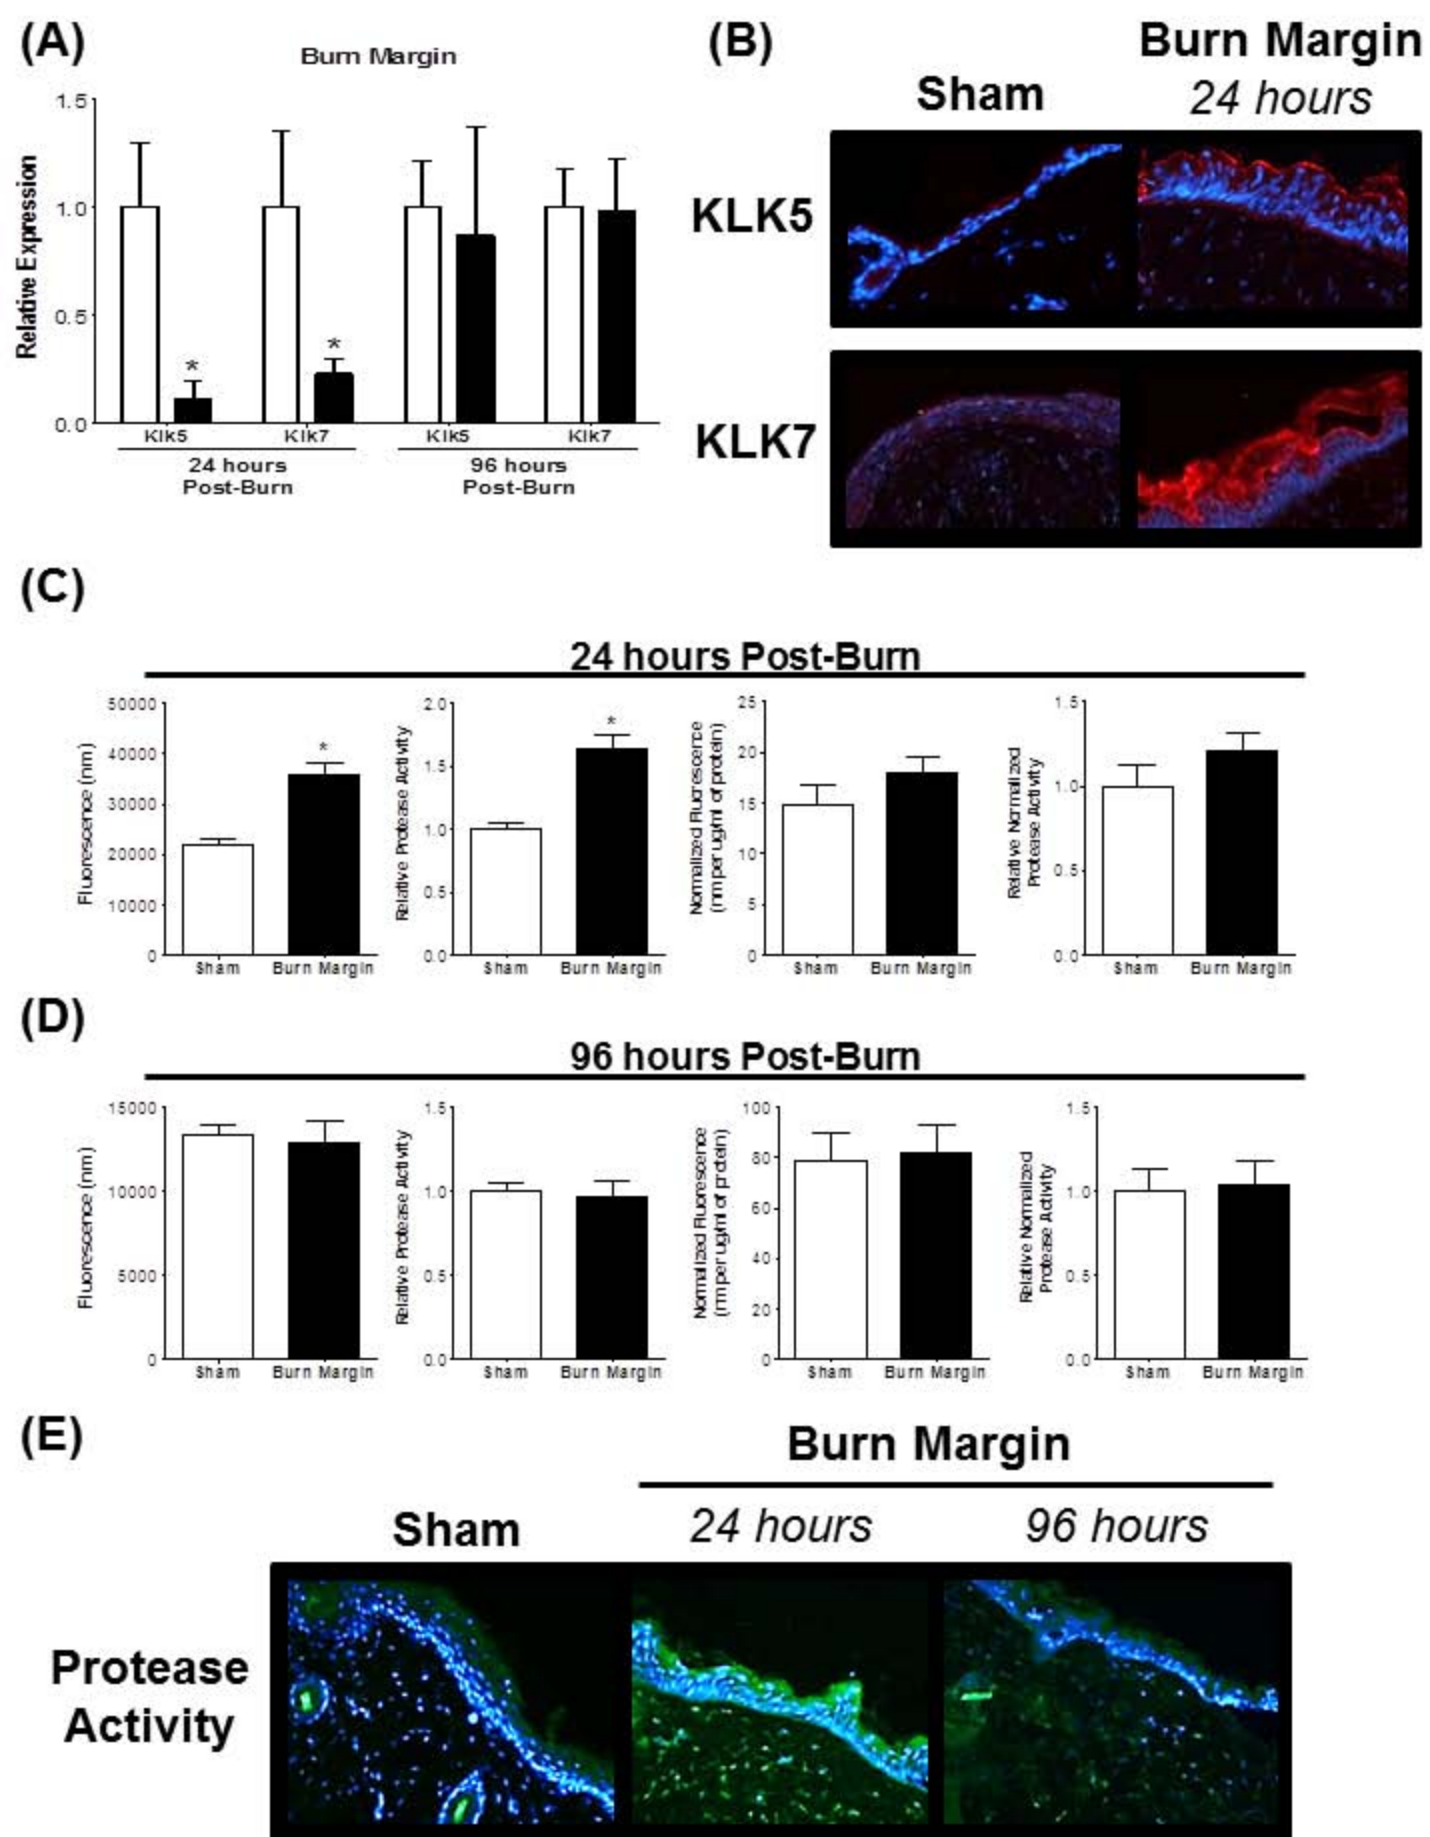

**Figure 3**

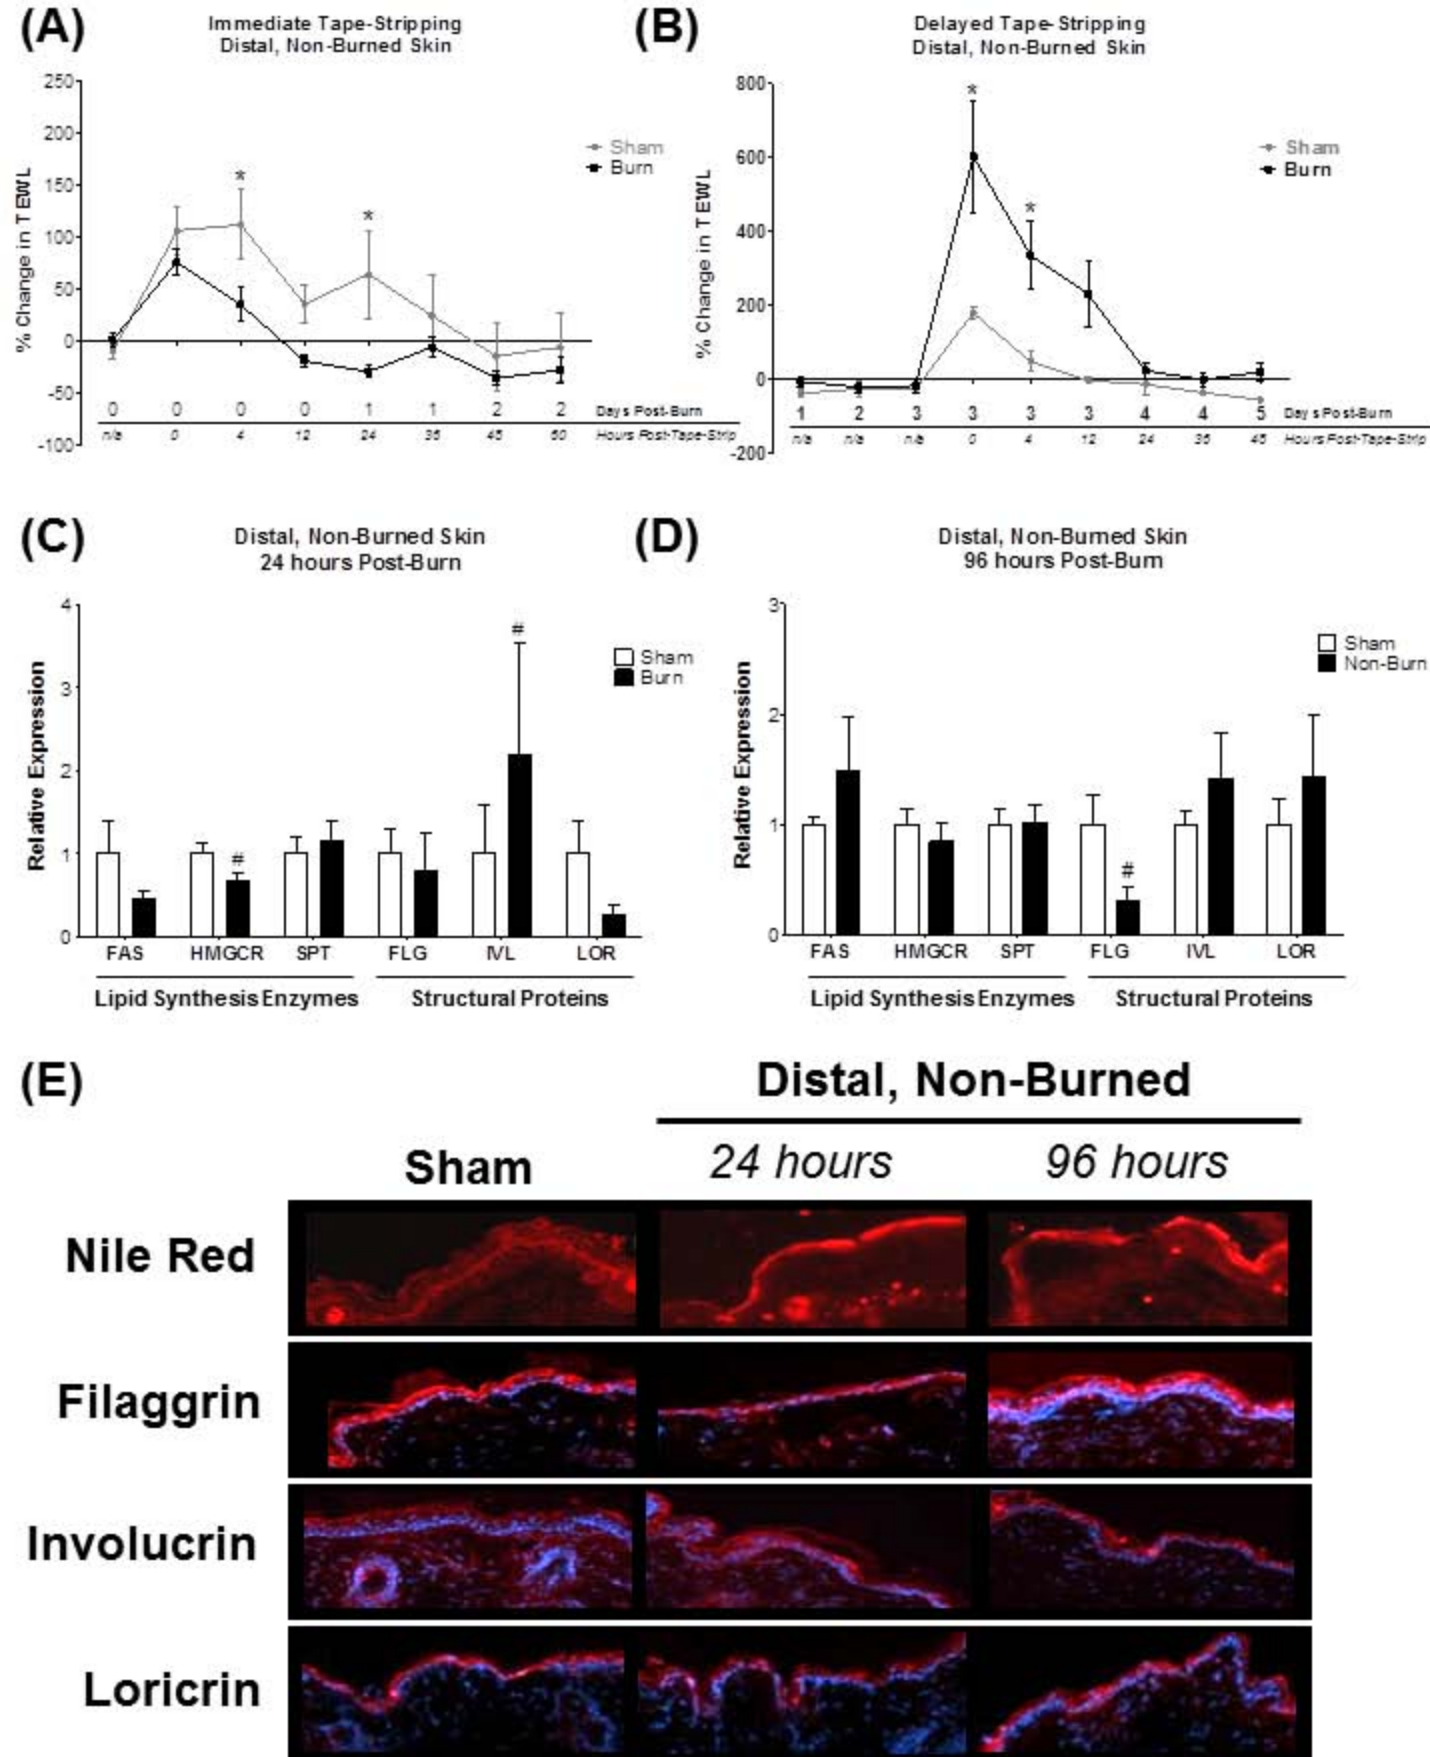

**Figure 4**

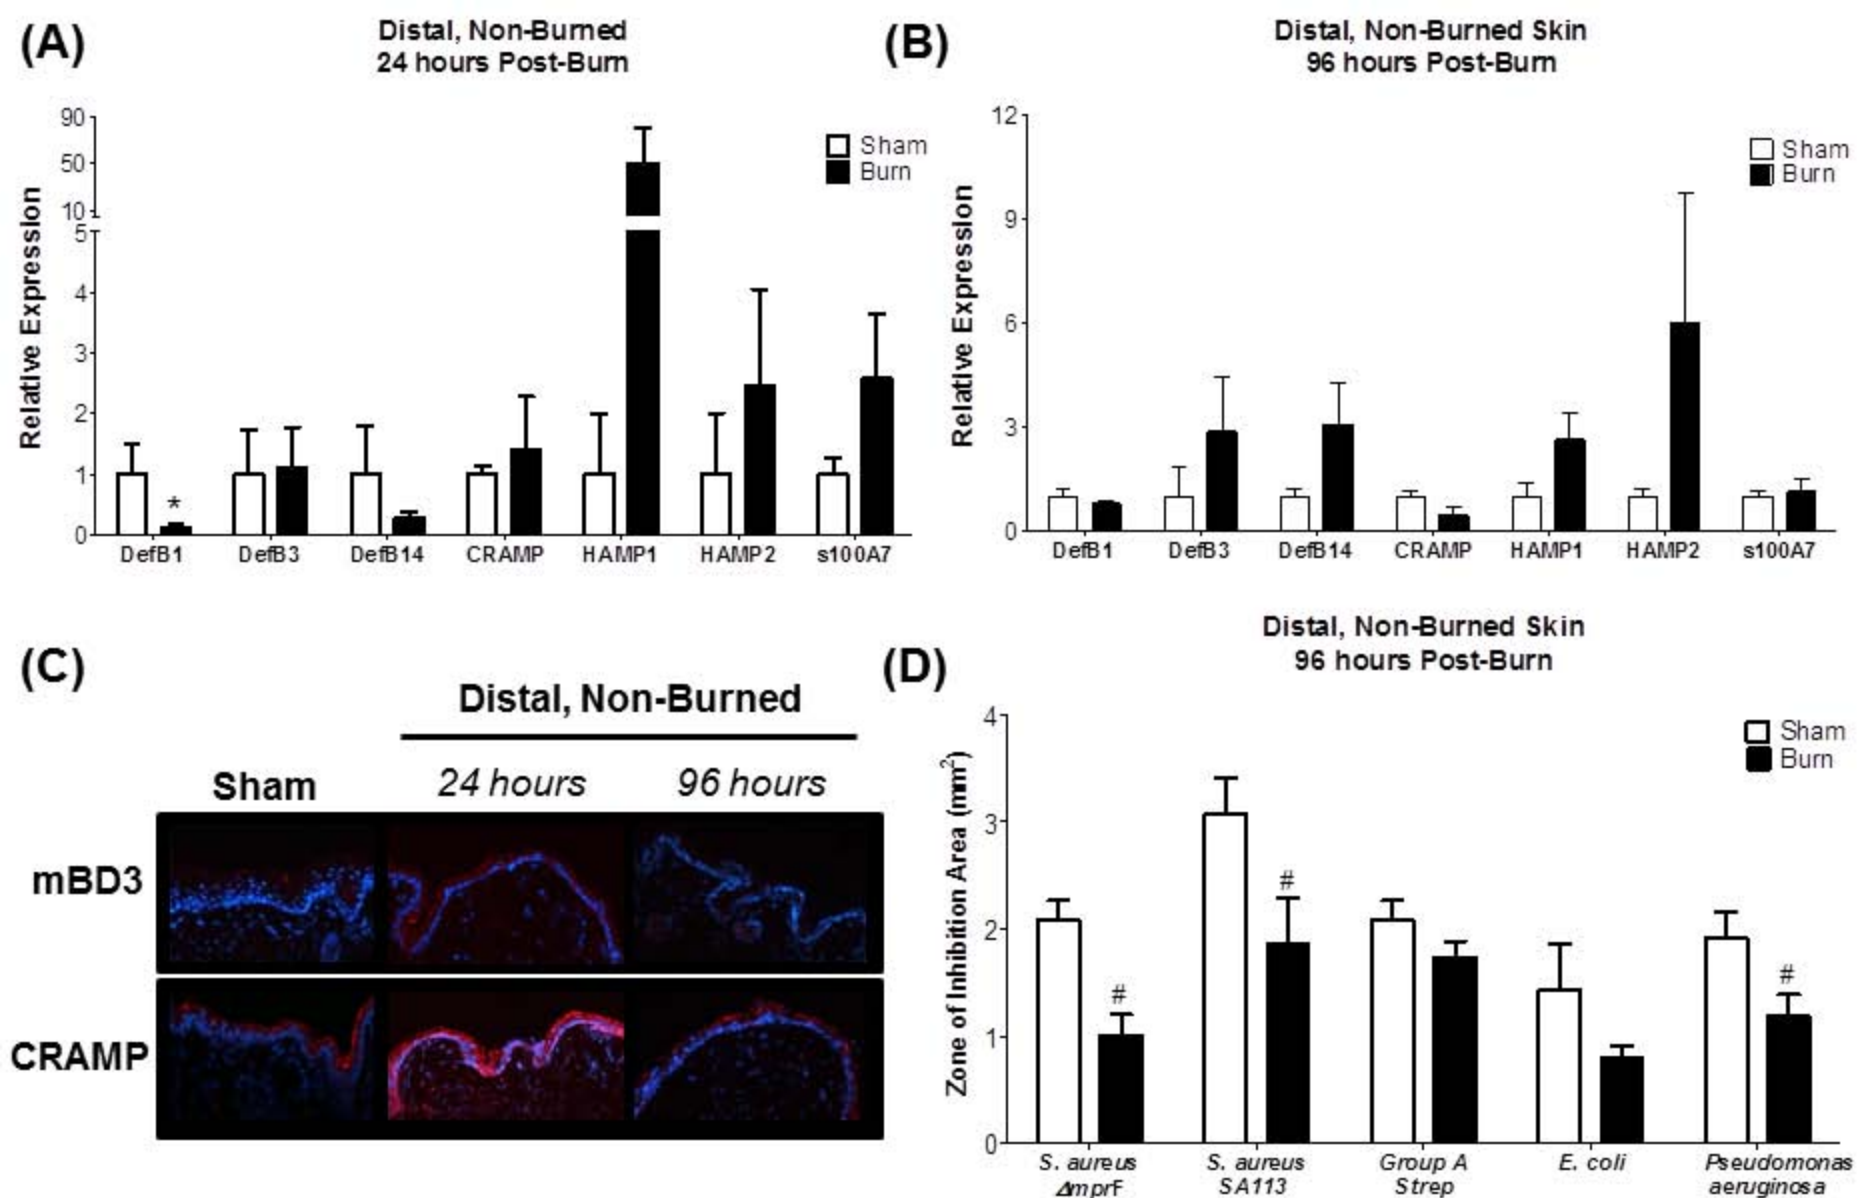

**Figure 5**

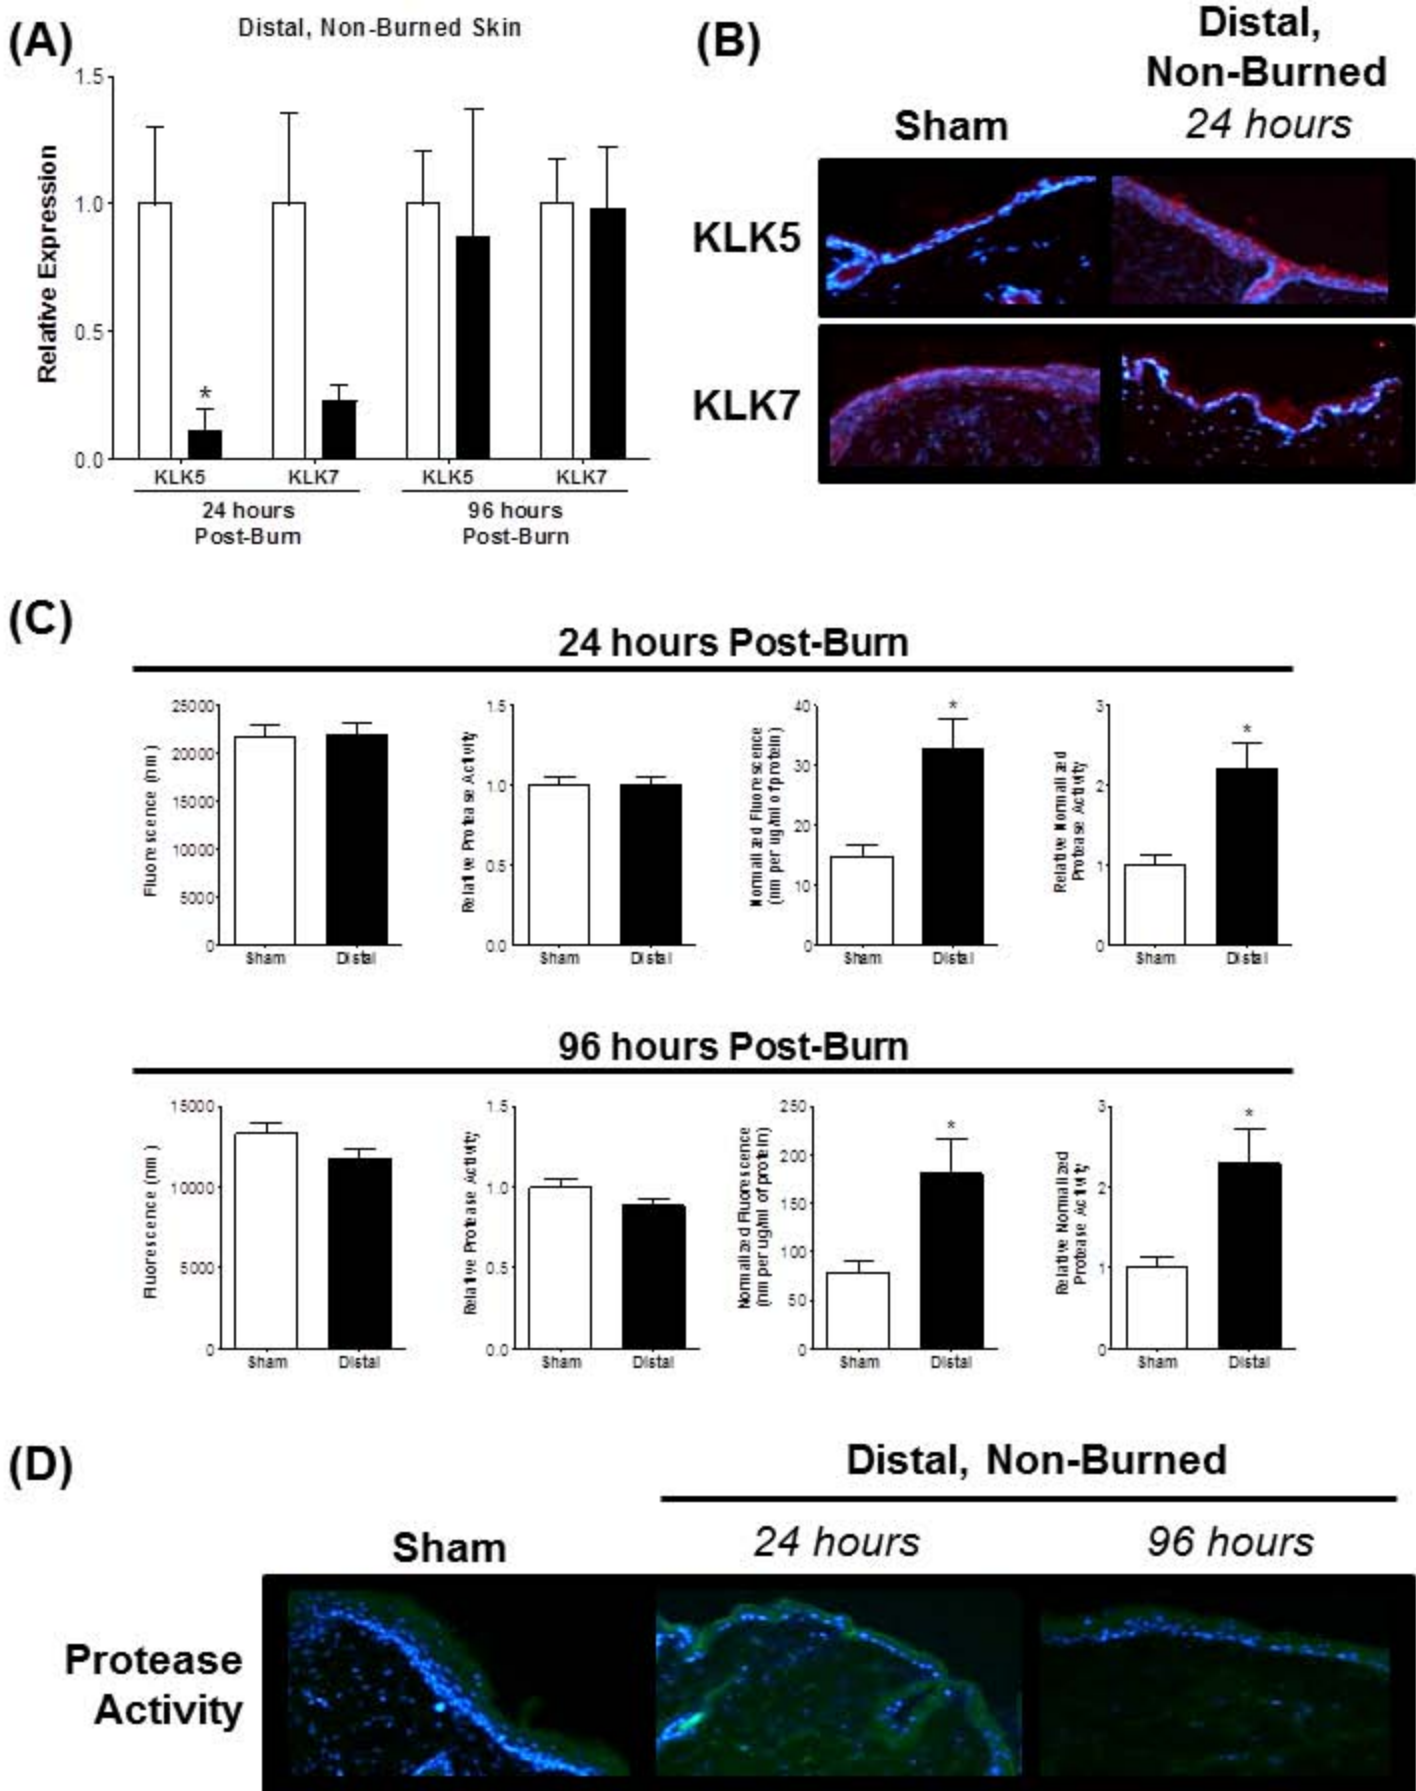

**Figure 6**

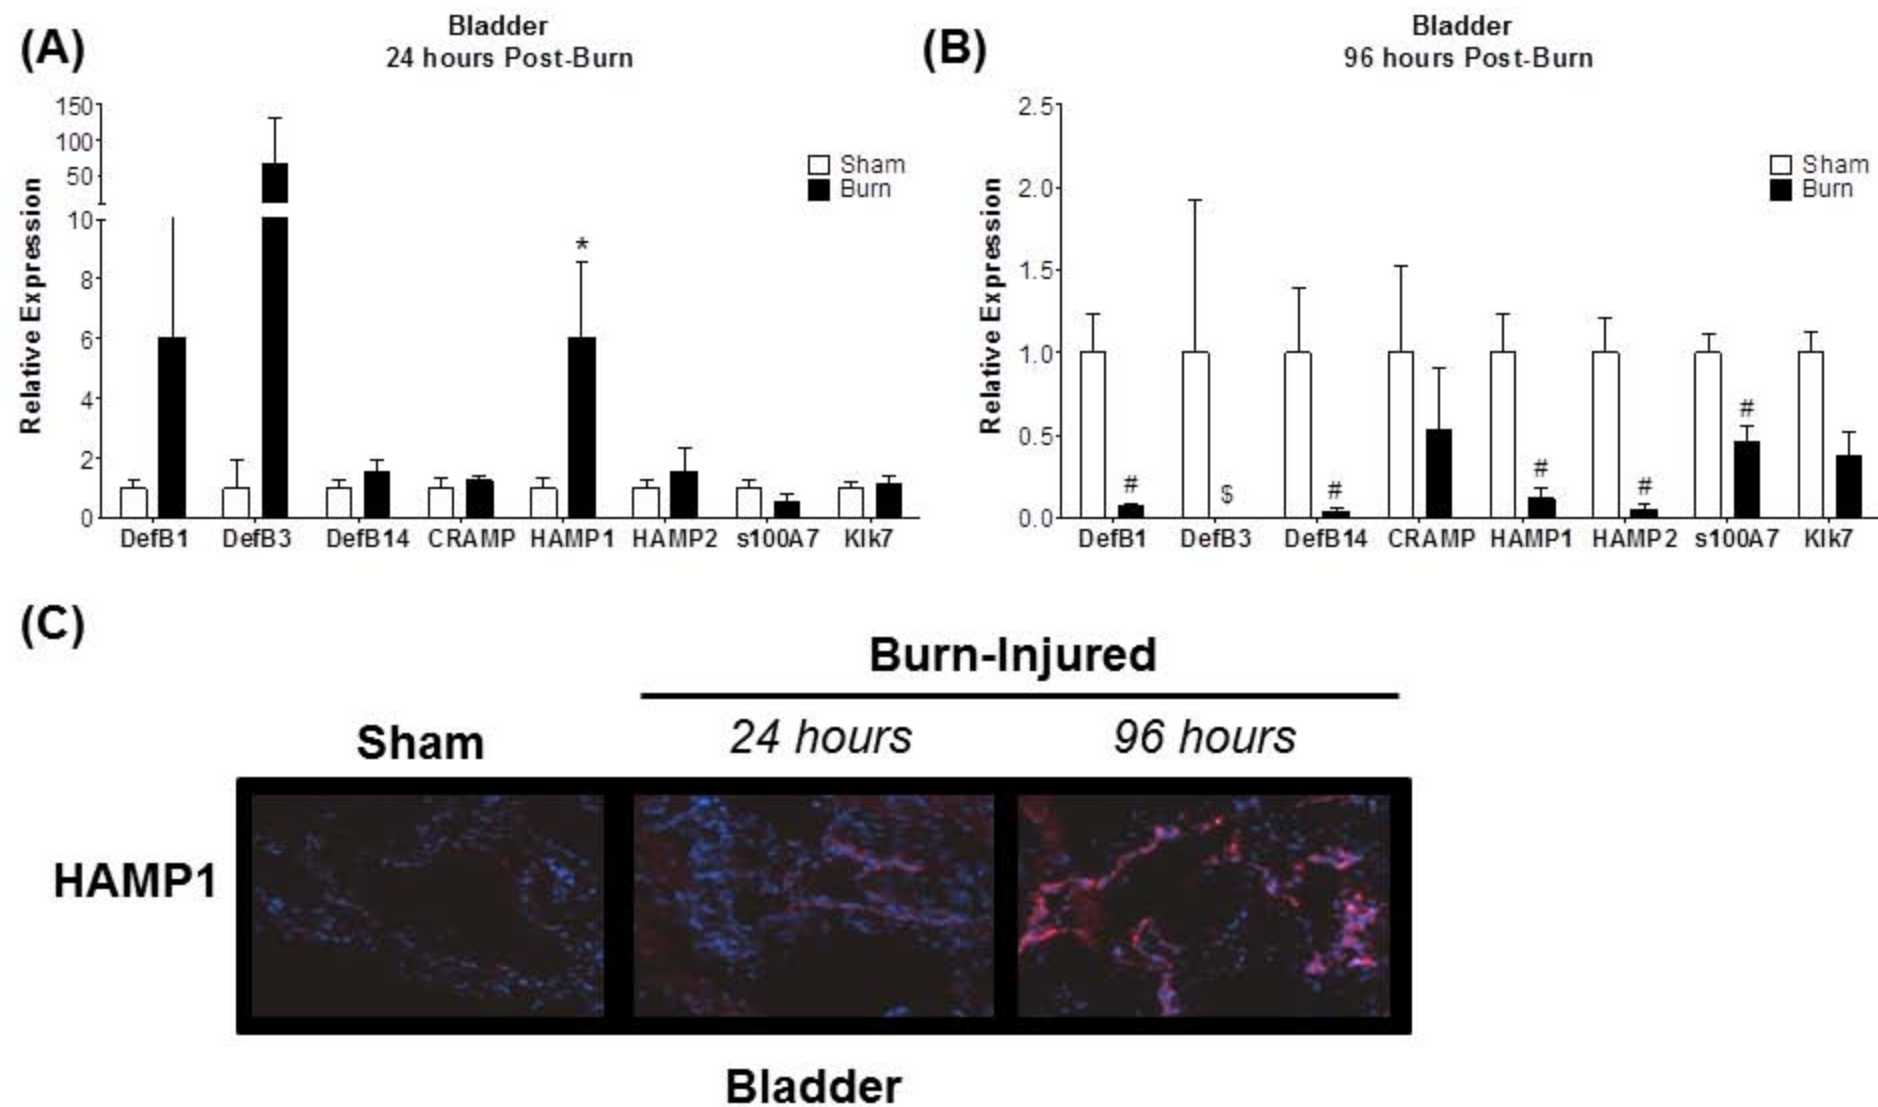

**Figure S1**

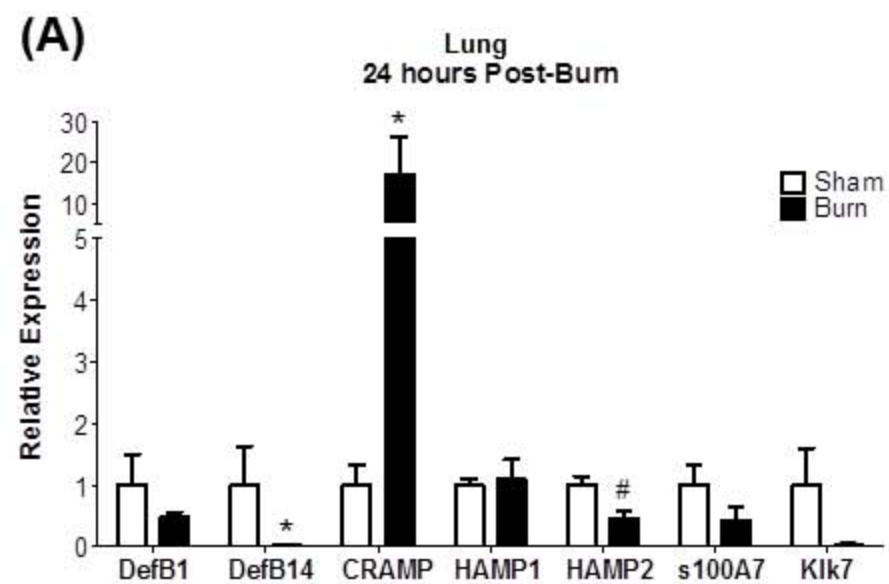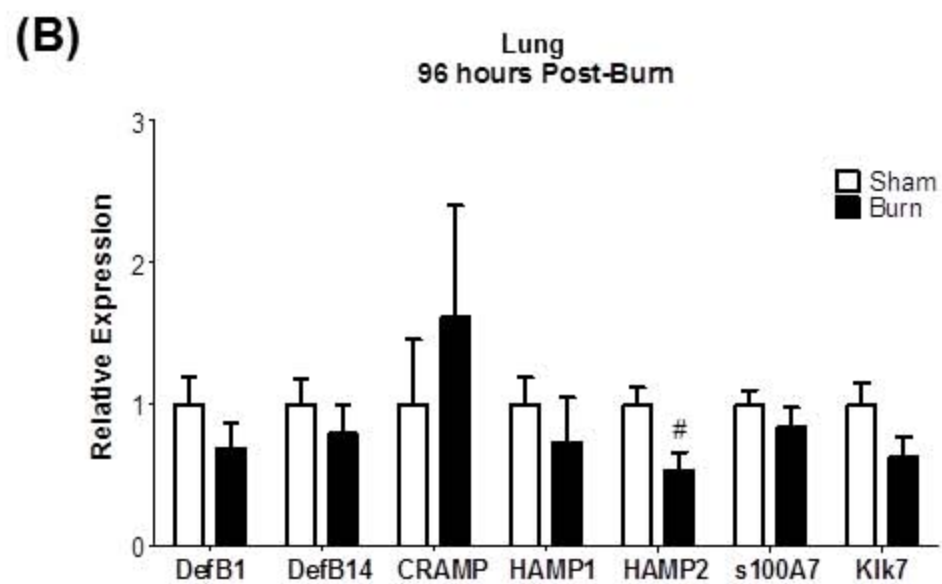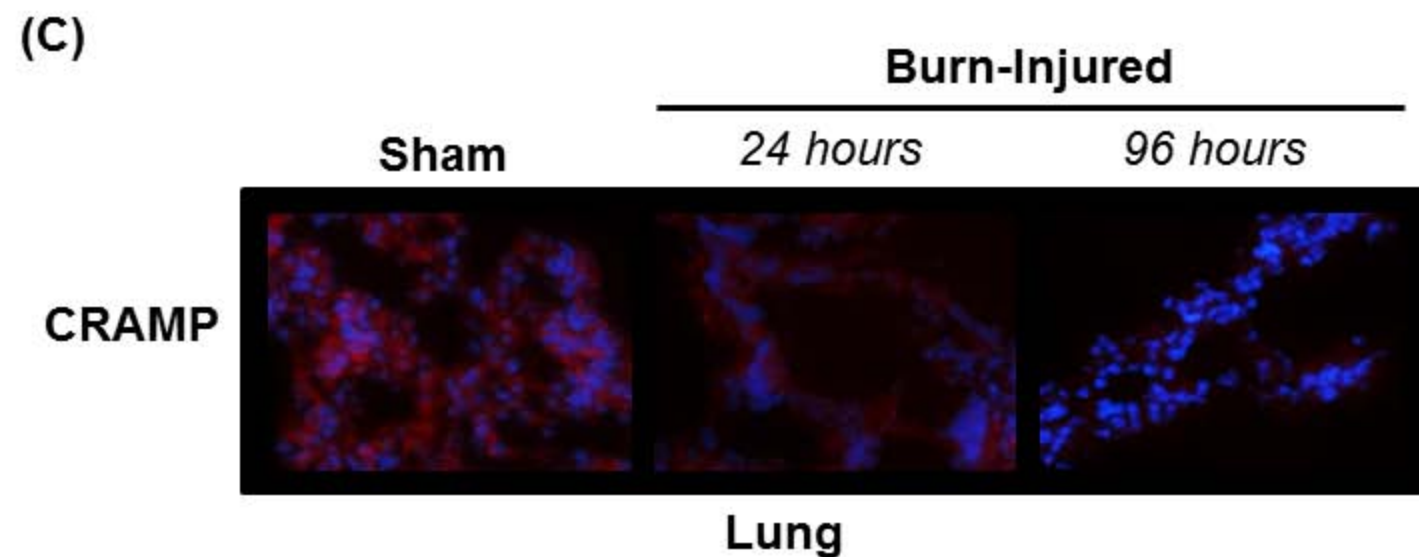

**Figure S2**



*Burn Duration*

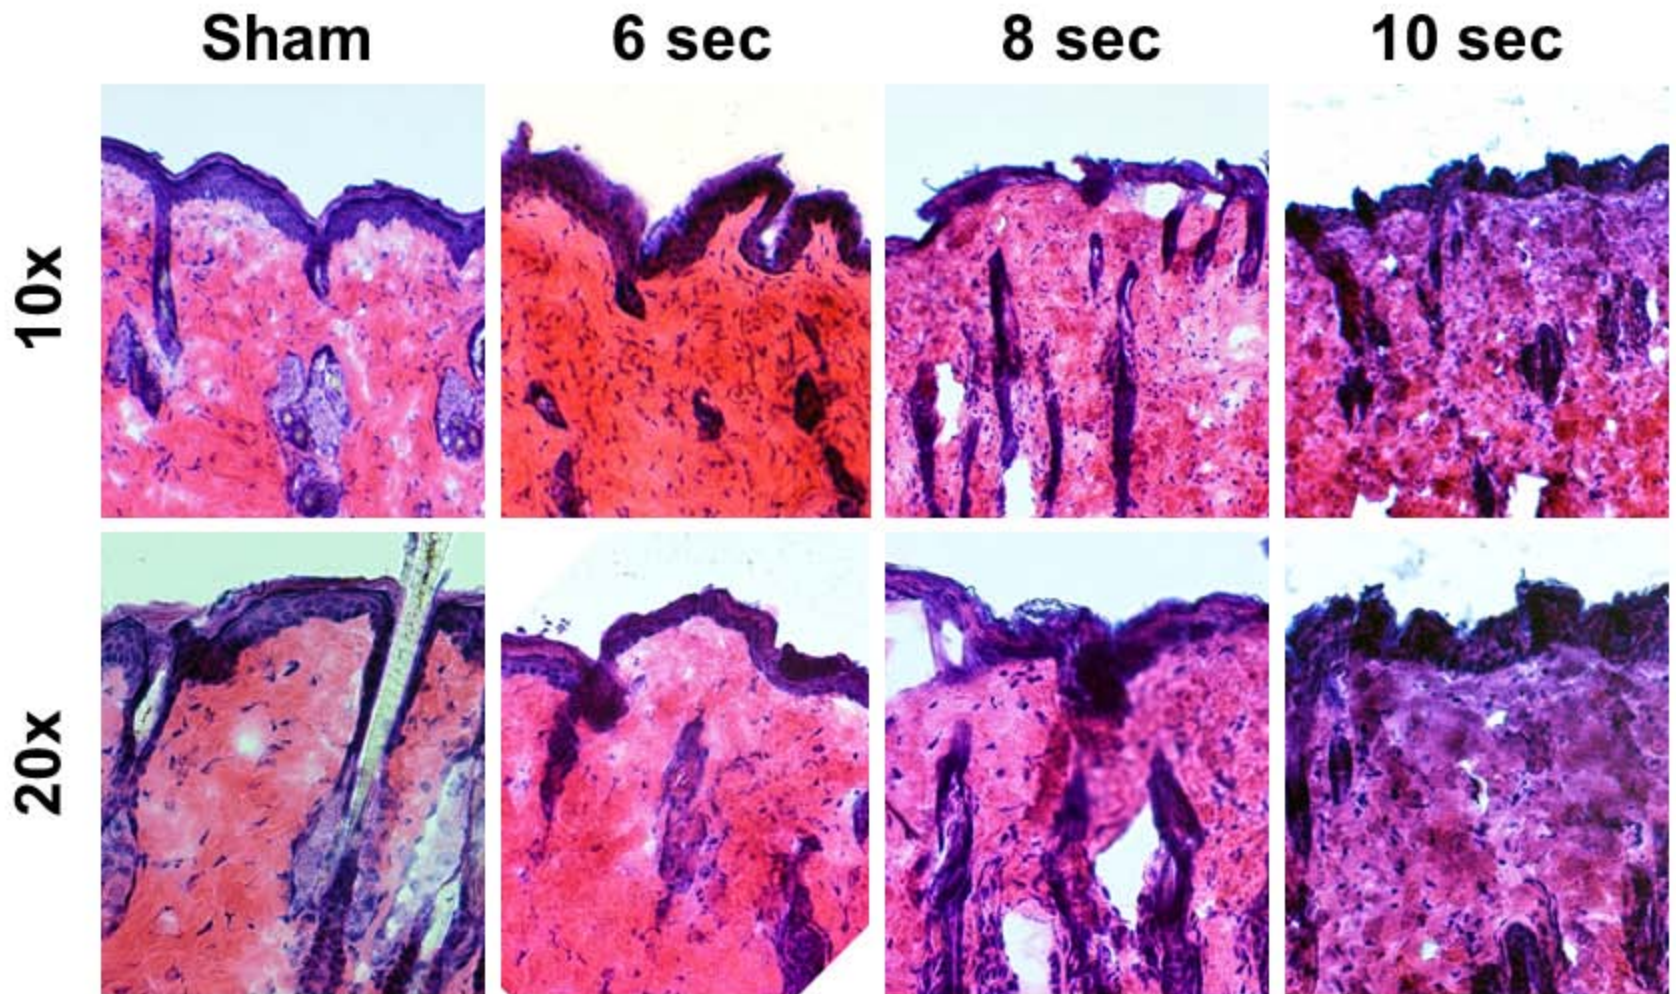

Figure S3

*Burn Duration*

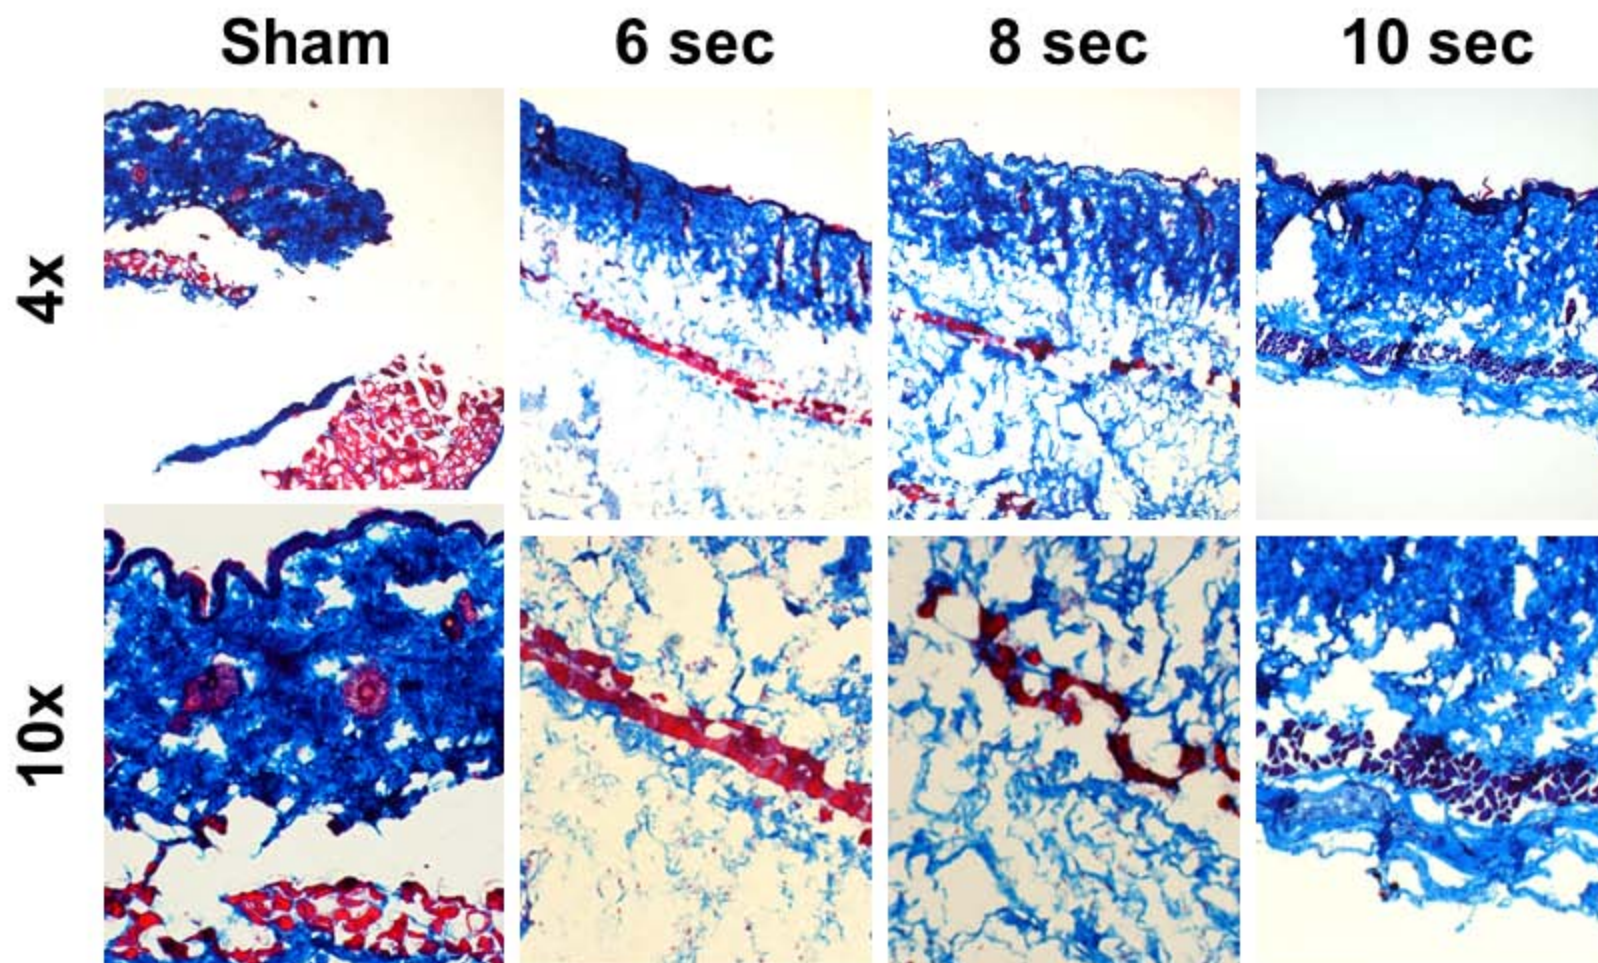

Figure S4

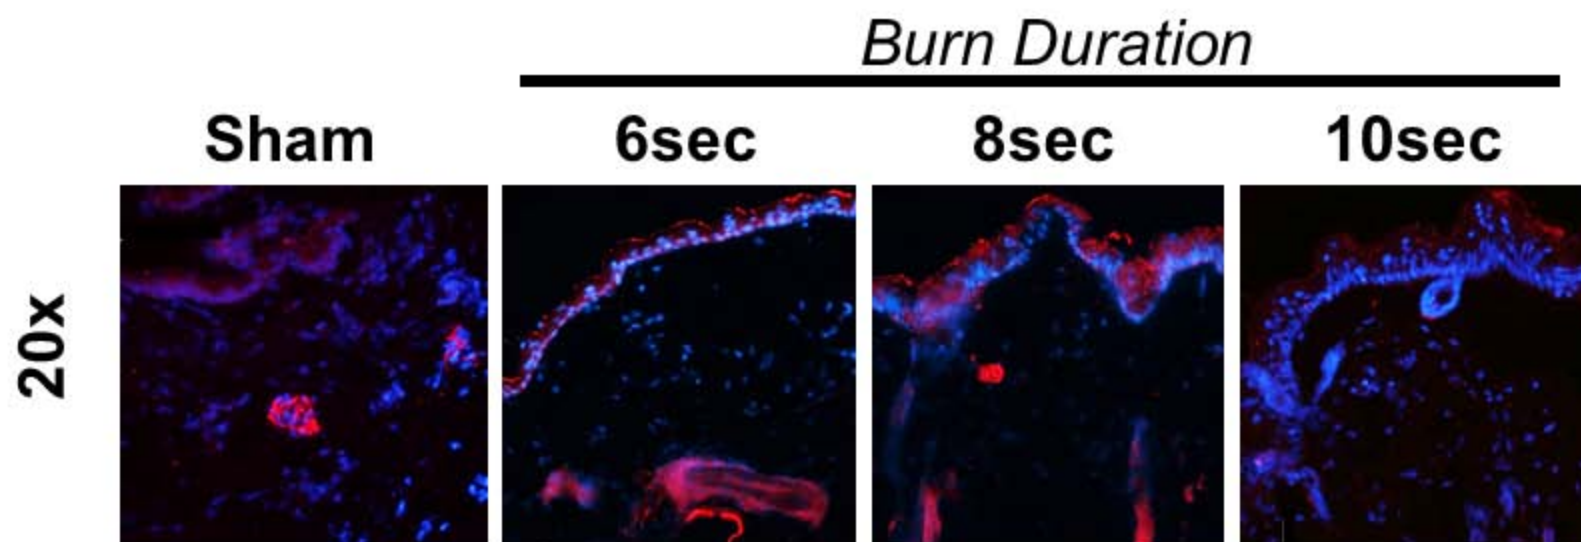

**Figure S5**

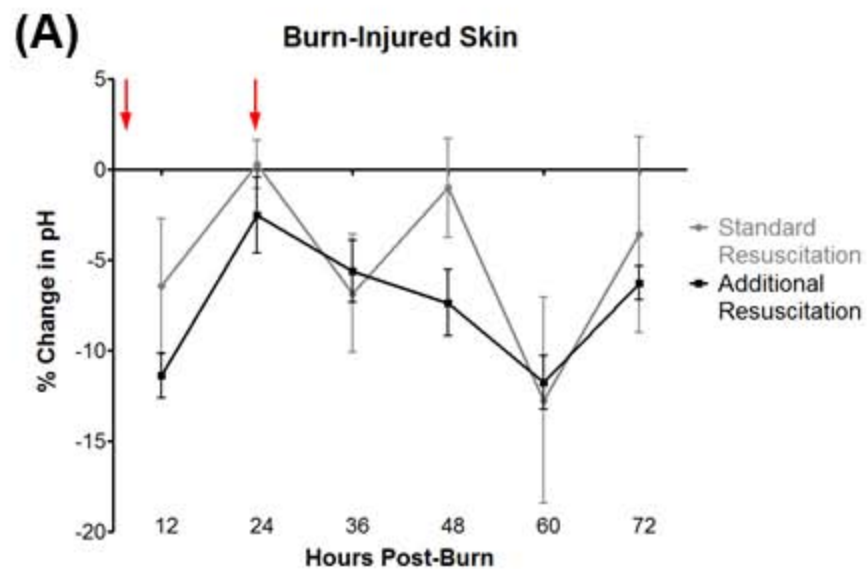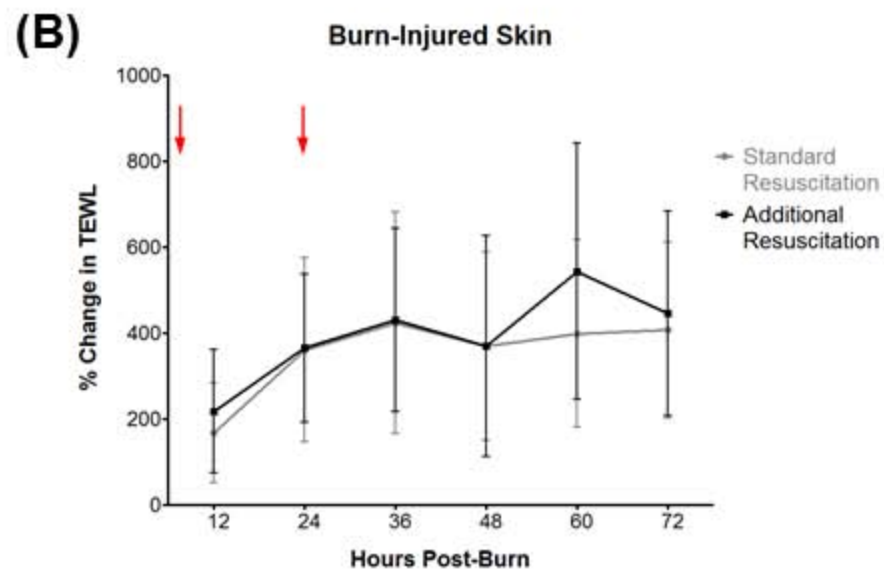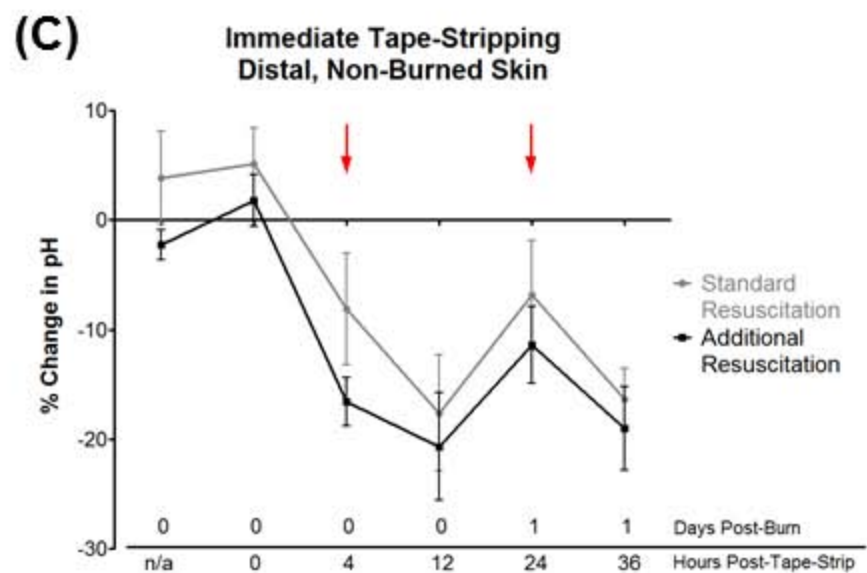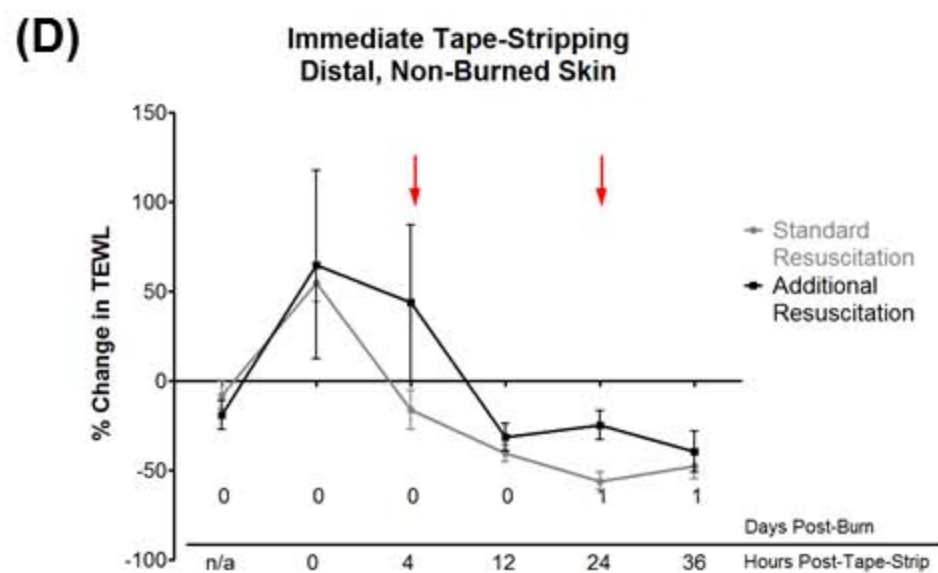

**Figure S6**
